parameters were calculated using a computer program for non-linear regression analysis [6].

## Results

The absorption of LP was significantly faster than that of HI. As shown in Figure 1A, maximum plasma insulin concentrations ( $C_{\max}$ ) were reached after 30 (LP) vs 51 min (HI). Peak insulin concentrations were significantly greater with LP (146  $\mu$ U/ml) than with HI (88  $\mu$ U/ml). Insulin concentrations returned to baseline values more quickly with LP than with HI. At 120 min after injection, plasma insulin concentrations were 37% of  $C_{\max}$  (LP) vs 77% (HI). Data obtained by computer-assisted calculation revealed that the absorption half-life of LP was significantly shorter compared with HI ( $12 \pm 8$  vs  $32 \pm 8$  min), whereas the elimination half-life and the volume of distribution of LP were not different from HI ( $43 \pm 21$  vs  $40 \pm 9$  min;  $61 \pm 54$  vs  $75 \pm 49$  l). Blood glucose levels declined within 20 min after LP injection (Figure 1B), whereas after HI injection blood glucose even increased during the first 40 min. The nadir of blood glucose was reached 3 h after LP injection, whereas with HI glucose levels decreased further.

## Discussion

In diabetic haemodialysis patients, the rapid changes in insulin and glucose metabolism require fast and

short-acting insulin preparations. In these patients, the time-action profile of HI with its delayed onset and prolonged duration of action does not coincide with glycaemic excursions. In contrast, LP is absorbed more rapidly, leading to a faster onset and shorter duration of action compared with HI. The pulsatile pharmacokinetic profile of LP may not only facilitate the correction of hyperglycaemia but may also decrease the risk of late hypoglycaemic episodes which are of particular clinical relevance in haemodialysed diabetic patients. Furthermore, LP offers the advantage of immediate pre-meal injection which is important for treatment satisfaction and may enhance the quality of life.

## References

1. Hammerman MR. Interaction of insulin with the renal proximal tubular cell. *Am J Physiol* 1985; 249: F1–F11
2. Kaufmann JM, Caro JF. Insulin resistance in uremia. Characterization of insulin action, binding and processing in isolated hepatocytes from chronic uremic rats. *J Clin Invest* 1983; 71: 698–708
3. Amico, JA, Klein I. Diabetic management in patients with renal failure. *Diabetes Care* 1981; 4: 430–434
4. Wilde, MI, McTavish D. Insulin Lispro: a review of its pharmacological properties and therapeutic use in the management of diabetes mellitus. *Drugs* 1997; 54: 597–614
5. Jehle PM, Fussgaenger RD, Kunze U, Dolderer M, Warchol W, Koop I. The human insulin analog insulin lispro improves insulin binding on circulating monocytes of intensively treated insulin-dependent diabetes mellitus patients. *J Clin Endocrinol Metab* 1996; 81: 2319–2327
6. Koeppel P, Hamann C. A program for non-linear regression analysis to be used on desk-top computers. *Comput Progr Biomed* 1980; 12: 121–128

Nephrol Dial Transplant (1999) 14 [Suppl 4]: 6–8

# Pharmacodynamic half-life and effect–time course in renal impairment

F. Keller and D. Czock

Division of Nephrology, University Hospital Ulm, Germany

## Background and objective

In patients with renal impairment, the elimination of drugs often is impaired, and elimination half-life increases [1]. In pharmacokinetics, the kinetic half-life ( $T_{1/2\text{kin}}^1$ ) is used to describe the relation between concentration (C) and time (t). To describe the relation

between effect (E) and concentration (C) the sigmoid  $E_{\max}$ -model is used with Hill coefficient (H), and concentration ( $CE_{50}$ ) producing half-maximum effect [2].

$$E = \frac{E_{\max} C^H}{CE_{50}^H + C^H}$$

If the term half-life is not reserved to be used for log-linear first order kinetics, a pharmacodynamic half-life can be derived for the effect–time course that depends on the concentration–time course. Such a parameter might be used to specify the effect–time course in renal impairment.

Correspondence and off print requests to: Prof. Dr. F. Keller, Universität Ulm, Abteilung Innere Medizin II, Sektion Nephrologie, Robert-Koch-Straße 8, D-89070 Ulm, Germany.

## Pharmacodynamic half-life

The bisection time ( $t_{2-1} = t_2 - t_1$ ) is required to decrease the effect by one half ( $E_2 = \frac{1}{2}E_1$ ). For the most simple case, this bisection is due to a mono-exponential decrease in concentrations according to the linear coefficient ( $\lambda$ ).

$$C_2 = C_1 \exp(-\lambda t_{2-1})$$

The bisection time of the effect depends on the linear coefficient ( $\lambda$ ):

$$t_{2-1} = (\ln[C_1/C_2])/\lambda$$

Transforming the equation of the sigmoid  $E_{\max}$  model, we obtain:

$$C_1^H = \frac{CE_{50}^H}{(E_{\max}/E_1) - 1}$$

The concentration ( $C_2$ ) at effect ( $E_2 = \frac{1}{2}E_1$ ) can also be stated.

$$C_2^H = \frac{CE_{50}^H}{(E_{\max}/\frac{1}{2}E_1) - 1}$$

Since ( $E_1 = E_{\max} C_1^H / [CE_{50}^H + C_1^H]$ ) we can eliminate  $C_2$  in the above equation derived for  $t_{2-1}$ .

$$t_{2-1} = (\ln \left[ \frac{C_1}{CE_{50}^H / [2(CE_{50}^H / C_1^H) + 1]^{1/H}} \right]) / \lambda$$

Transformation results in:

$$t_{2-1} = (1/\lambda) (1/H) \ln[2 + C_1^H/CE_{50}^H]$$

The bisection time of the effect ( $t_{2-1}$ ) depends on the linear coefficient, and thus on the kinetic half-life ( $T_{\frac{1}{2}kin}^1 = \ln(2)/\lambda$ ).

$$t_{2-1} = [T_{\frac{1}{2}kin}^1 / \ln(2)] (1/H) \ln[2 + C_1^H/CE_{50}^H]$$

The bisection time ( $t_{2-1}$ ) of the pharmacodynamic effect can be termed pharmacodynamic half-life ( $T_{\frac{1}{2}dyn}^1 = t_{2-1}$ ). The pharmacodynamic half-life ( $T_{\frac{1}{2}dyn}^1$ ) is a concentration-dependent parameter and a non-linear function of the kinetic half-life ( $T_{\frac{1}{2}kin}^1$ ), where  $[1/\ln(2) = 1.44]$ .

$$T_{\frac{1}{2}dyn}^1 = T_{\frac{1}{2}kin}^1 (1.44/H) \ln[2 + C_1^H/CE_{50}^H]$$

High drug concentrations ( $C_1 \gg CE_{50}$ ) will lead to prolonged drug action, and increased dynamic half-life [3]. A high Hill coefficient ( $H > 1$ ) results in a short dynamic half-life ( $T_{\frac{1}{2}dyn}^1 < T_{\frac{1}{2}kin}^1$ ).

## Example and discussion

Physostigmine has a pharmacokinetic half-life of 0.27 h. The pharmacodynamic effect on plasma butyrylcholinesterase activity decreases with a 5-times longer half-life of 1.4 h [4]. This indicates that the pharmacokinetic-pharmacodynamic relation is located in the right bent, concave and saturated part of the sigmoid  $E_{\max}$ -model ( $C > CE_{50}$ ). Since for low concentrations the effect near-linearly increases with the concentration,

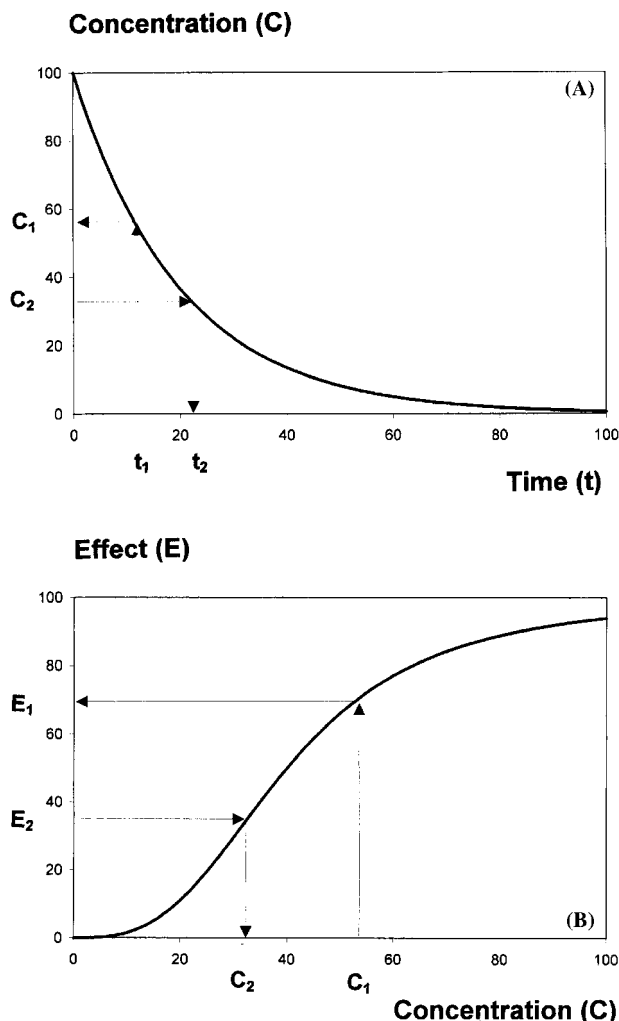

**Fig. 1.** Pharmacokinetic half-life and pharmacodynamic half-life. (A) At time  $t_1$  concentration is  $C_1$ , and decreases to concentration  $C_2$  at time  $t_2$ , where obviously ( $C_2 > \frac{1}{2}C_1$ ). The corresponding time interval is less than one pharmacokinetic half-life ( $t_2 - t_1 < T_{\frac{1}{2}kin}^1$ ). (B) Concentration  $C_1$  produces the effect  $E_1$ , that is bisected to one-half, or  $E_2$  at concentration  $C_2$ , where ( $E_2 = \frac{1}{2}E_1$ ). The respective time interval ( $t_2 - t_1$ ) is required to make one-half of the effect, and corresponds to the pharmacodynamic half-life ( $t_2 - t_1 = T_{\frac{1}{2}dyn}^1$ ). For this example, the pharmacokinetic half-life is shorter than the pharmacodynamic half-life ( $T_{\frac{1}{2}kin}^1 < T_{\frac{1}{2}dyn}^1$ ), in agreement with sigmoidicity coefficient ( $H > 1$ ).

it can be assumed that it holds ( $H \approx 1$ ). The peak level ( $C_{peak}$ ) was 12.5 nM, corresponding to 3 ng/ml. According to the above equations, the unknown concentration at half-maximum effect can be calculated ( $CE_{50} = 0.42$  nM), corresponding to 0.1 ng/ml. Since we do not know the  $E_{\max}$ , the value would be read 12-times higher from the published graph ( $CE_{50} = 5$  nM), corresponding to 1.2 ng/ml.

We can draw practical inferences on the usually unknown dynamic parameters if we know the kinetic and dynamic half-lives describing drug elimination and effect duration [5]. With constant target concentration ( $C_{peak} = C_1$ ), dynamic half-life or duration of drug effect will increase in proportion to elimination half-life in renal failure. Even when the dose is adjusted to

identical target concentrations ( $C_{\text{peak}} = \text{constant}$ ), the effect might be longer lasting with a prolonged dynamic half-life in renal impairment.

## References

1. Kunin CM, Rees SB, Merrill JP, Finland M. Persistence of antibiotics in blood of patients with acute renal failure: I. tetracyclin and chlortetracyclin. *J Clin Invest* 1959; 38: 1487–1497
2. Bellissant E, Sébille V, Vaintaud G. Methodological issues in pharmacokinetic–pharmacodynamic modelling. *Clin Pharmacokinet* 1998; 35: 151–166
3. Cawello W, Antonucci T. The correlations between pharmacodynamics and pharmacokinetics: basics of pharmacokinetics–pharmacodynamics modeling. *J Clin Pharmacol* 1997; 37 (Suppl 1): 65S–69S
4. Asthana S, Greig NH, Hegedus L, Holloway HH, Raabele KC, Schapiro MB, Soncrant TT. Clinical pharmacokinetics of physostigmine in patients with Alzheimer's disease. *Clin Pharmacol Ther* 1995; 58: 299–309
5. Keller F, Czock D, Zellner D, Giehl M. Relationship between pharmacokinetic half-life and pharmacodynamic half-life in effect-time modeling. *Int J Clin Pharmacol Ther* 1998; 36: 168–175

Nephrol Dial Transplant (1999) 14 [Suppl 4]: 8–10

## Cross-talk between activated tubular epithelia of human kidney and monocytes: a basis for target cell-specific pharmacotherapy?

J. E. Scherberich, W. A. Nockher<sup>1</sup> and P. C. Baer<sup>2</sup>

2nd Medical Department, Hospital München-Harlaching, <sup>1</sup>Institute of Clinical Chemistry, Hospital München-Bogenhausen, München and <sup>2</sup>Medical Clinics IV, J. W. Goethe University Frankfurt/Main, Germany

Changes in the tubulointerstitial compartment govern the progression and outcome in most patients suffering from renal diseases. Under pathological conditions, the influx of monocytes into the kidney and local proliferation of blood-derived macrophages releasing proinflammatory and fibrogenic cytokines contribute to structural and functional deterioration [1]. In addition, cell lesions may result directly from cooperative but maladapted cell interactions between 'activated tubular cells' which are capable of recruiting and stimulating monocytes to invade the glomeruli and/or the tubulointerstitium, thus resulting in progressive sublethal injury, necrosis and fibrosis. In the present work, we summarize our experimental and clinical data which support an engaged interaction (cross-talk) of tubular epithelia of proximal and distal origin with monocytes/macrophages in human renal diseases [2–4].

### Human renal proximal and distal tubular cells.

Human renal proximal (PTC) and distal (DTC) tubule cells were isolated immunomagnetically as described earlier, applying monoclonal antibodies raised against distinct segments of the human nephron [2]. PTC were strongly positive for aminopeptidase M (CD13);

however, DTC were negative for CD13 antigen. Ultrastructural analyses of PTC primary isolates revealed a highly preserved brush border, whereas DTC showed multiple basolateral invaginations and many fewer apical microvilli. Both cell types formed tight junctions and expressed cytokeratin and vimentin, whereas stains for desmin,  $\alpha$ -actin and von Willebrand's factor were negative. A different response after hormonal stimulation [parathyroid hormone (PTH), calcitonin] was found where cAMP production was especially high in DTC after challenge with PTH [2,5].

### Activated tubule cells

After incubation of cultured cells with a mix of 25 U/ml interleukin (IL)-1 $\beta$ , 10 ng/ml tumour necrosis factor- $\alpha$  (TNF- $\alpha$ ) and 200 U/ml interferon- $\gamma$  (IFN- $\gamma$ ), the production of RANTES, a chemokine for monocytes, increased dramatically in both PTC and DTC [6]. Compared with basal conditions, the release of RANTES into the supernatant was 107- to 133-fold increased up to 364 pg/48 h/10<sup>5</sup> cells. In parallel, expression of HLA-DR and interstitial cell adhesion molecule-1 (ICAM-1) increased significantly, as analysed by flow cytometry. Unstimulated PTC and DTC did not express HLA-DR; DTC expressed ICAM-1 constitutively in very small amounts.

### Effect of anti-inflammatory drugs

Glucocorticoids such as dexamethasone (10<sup>-6</sup> M) as well as cyclooxygenase II inhibitors down-regulated

Correspondence and off print requests to: Professor Dr J. E. Scherberich, 2nd Med. Abteilung, Schwerpunkt Nieren- und Hochdruckkrankheiten, Krh. München-Harlaching, Akadem. Lehrkrankenhaus der Ludwig-Maximilians-Universität, Sanatoriumsplatz 2, D- 81545 München, Germany.
